# Supplementary material
Source: publisher figshare collection journal article supplement (https://acs.figshare.com/ndownloader/files/28625147)
Supplement: Supplementary file 1 [file 28625147]

Supporting Information for

**Assembly of Chiral Cluster-Based Metal-Organic Frameworks  
and the Chirality Memory Effect during their Disassembly**

Guocheng Deng, Boon K. Teo\* and Nanfeng Zheng\*

Collaborative Innovation Center of Chemistry for Energy Materials, State Key Laboratory for Physical Chemistry of Solid Surfaces, National & Local Joint Engineering Research Center of Preparation Technology of Nanomaterials, College of Chemistry and Chemical Engineering, Xiamen University, Xiamen 361005, China

\*Corresponding Authors. Email: nfzheng@xmu.edu.cn, boonkteo@xmu.edu.cn

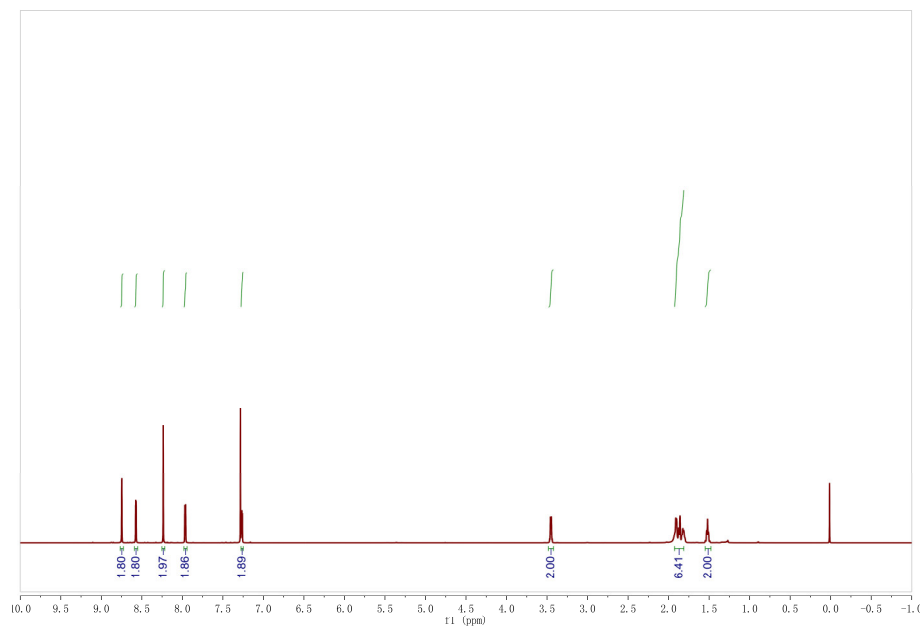

**Figure S1.** <sup>1</sup>H NMR spectrum of **LS** in CDCl<sub>3</sub>.

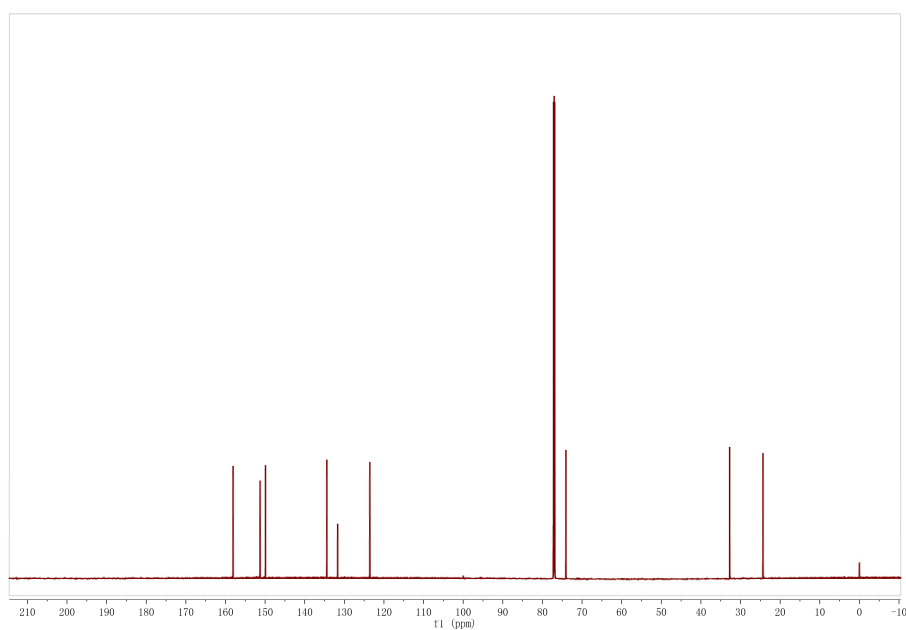

**Figure S2.** <sup>13</sup>C NMR spectrum of **LS** in CDCl<sub>3</sub>.

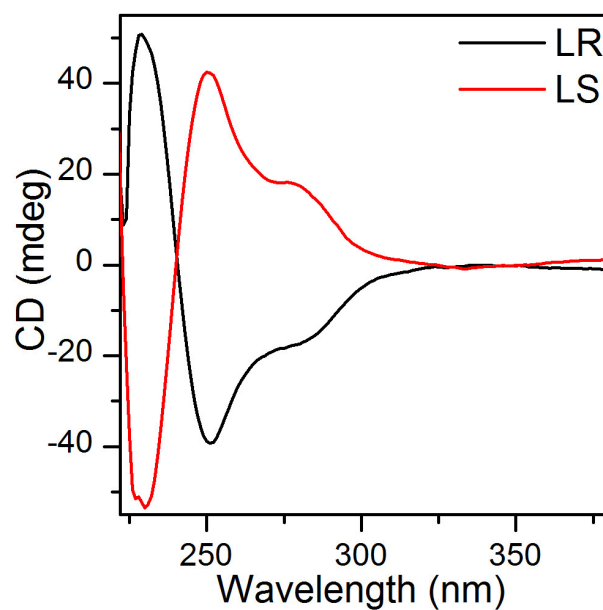

**Figure S3.** CD spectra of **LR** and **LS** in dichloromethane solution.

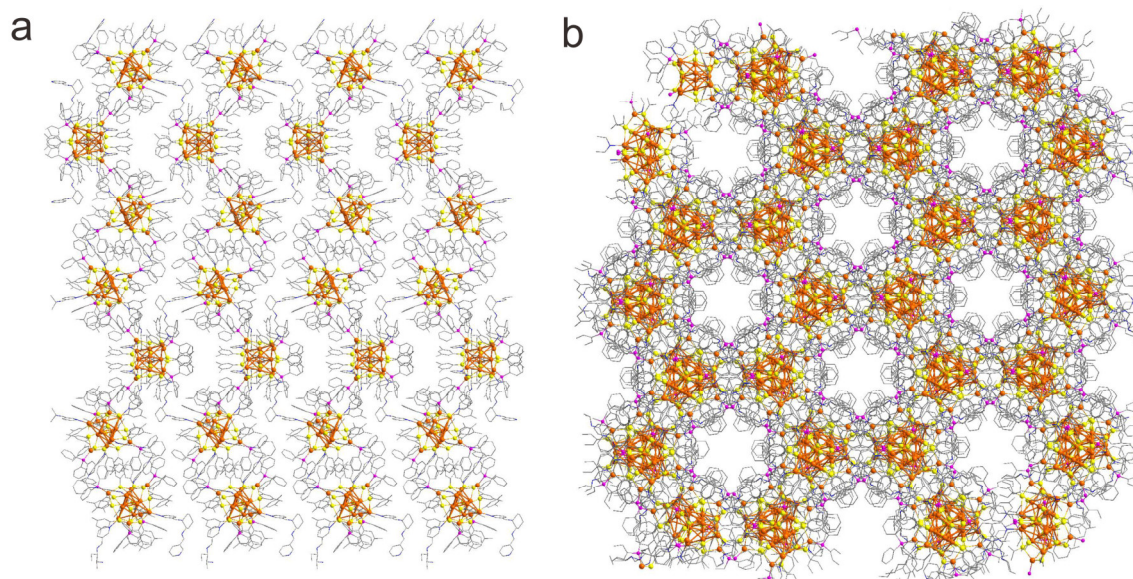

**Figure S4.** Crystal structure of **Ag<sub>14</sub>-LS** viewed along *b* (a) and *c* axis (b). Color legend: orange sphere, Ag; yellow sphere, S; pink sphere, P; blue sphere, N; grey sphere, C. All hydrogen and fluorine atoms are omitted for clarity.

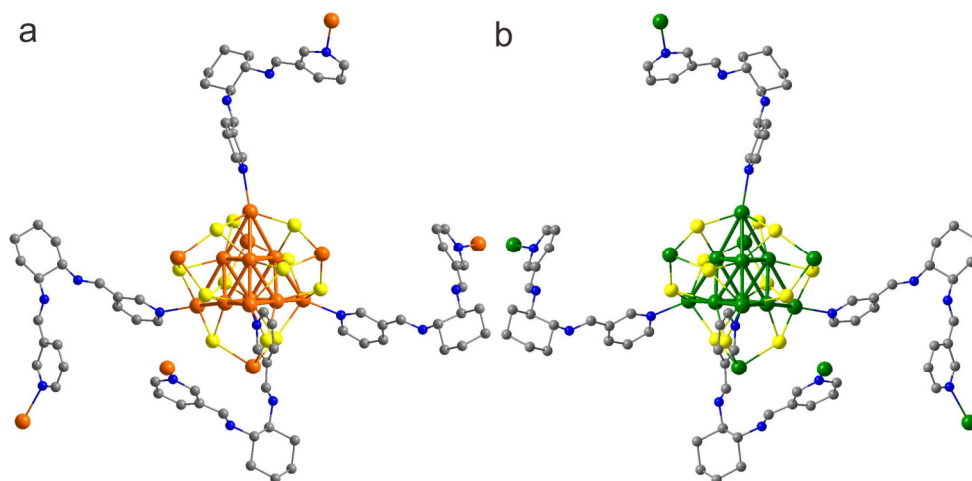

**Figure S5.** The structures of the building blocks of **Ag<sub>14</sub>-LS** (a) and **Ag<sub>14</sub>-LR** (b). Color legend: orange and green sphere, Ag; yellow sphere, S; blue sphere, N; grey sphere, C.

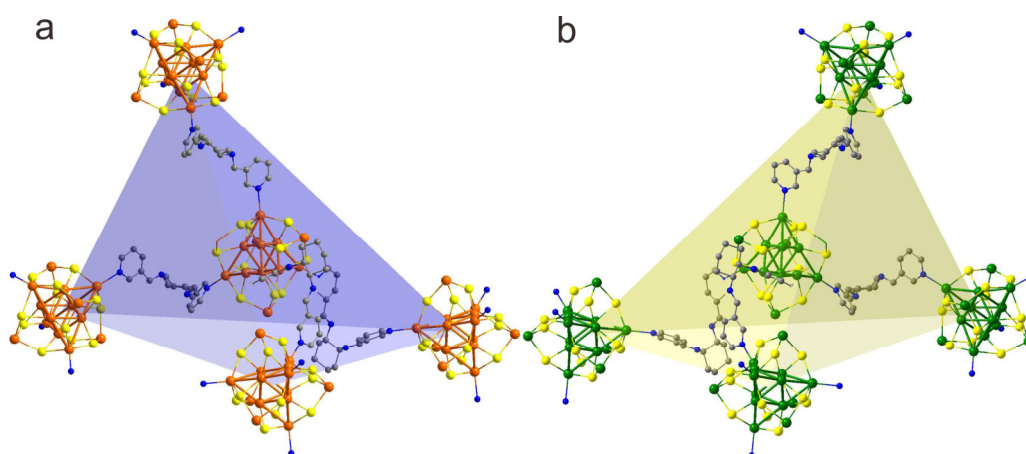

**Figure S6.** Distorted tetrahedron structures form by the **Ag<sub>14</sub>** building blocks in **Ag<sub>14</sub>-LS** (a) and **Ag<sub>14</sub>-LR** (b). Color legend: orange and green sphere, Ag; yellow sphere, S; blue sphere, N; grey sphere, C.

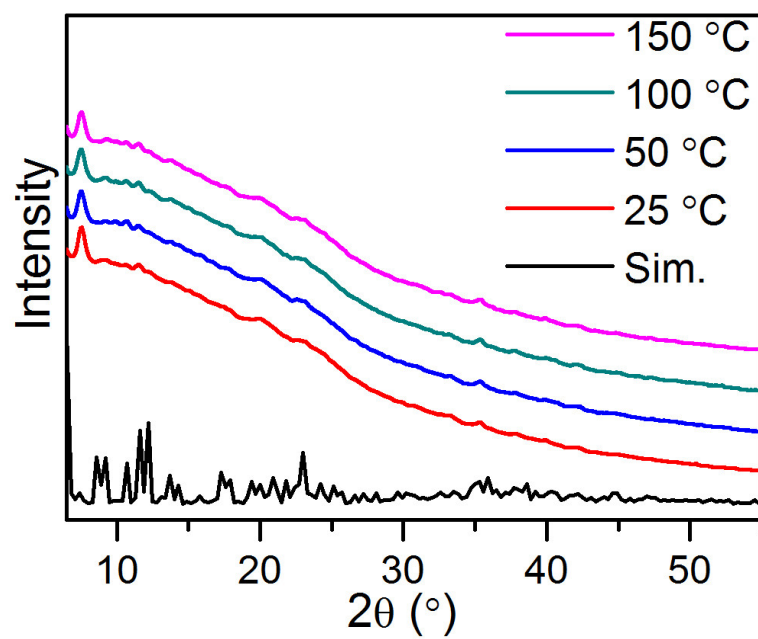

**Figure S7.** PXRD of  $\text{Ag}_{14}\text{-LR}$  from 25 °C to 150 °C.

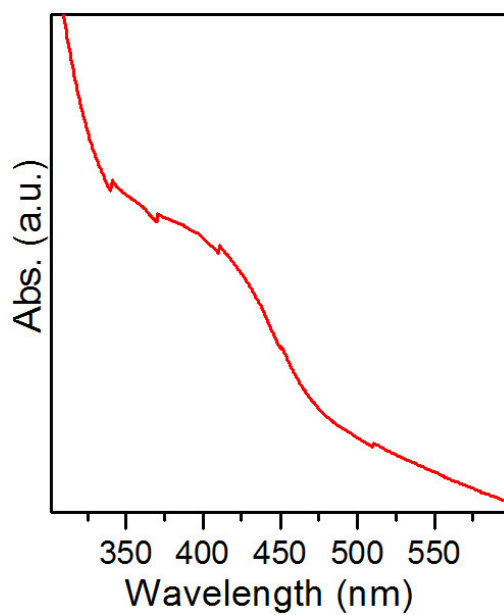

**Figure S8.** Solid state UV-vis spectrum of  $\text{Ag}_{14}\text{-LS}$  (crystals).

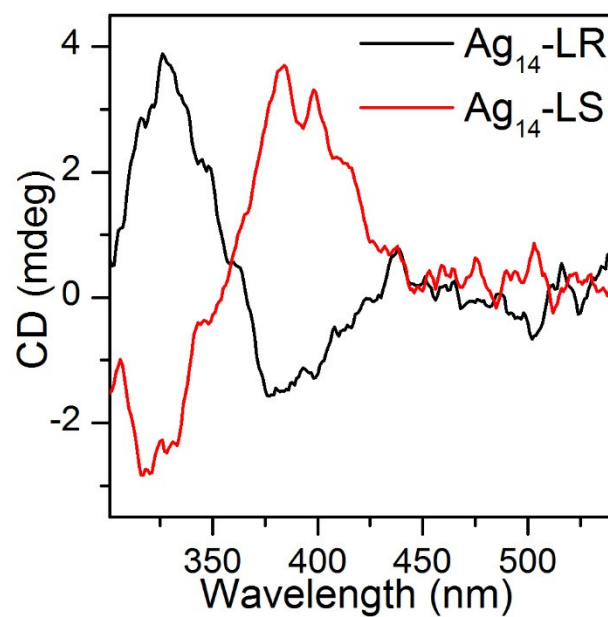

**Figure S9.** Solid state CD spectra of  $\text{Ag}_{14}\text{-LS}$  (crystals) and  $\text{Ag}_{14}\text{-LR}$  (crystals).

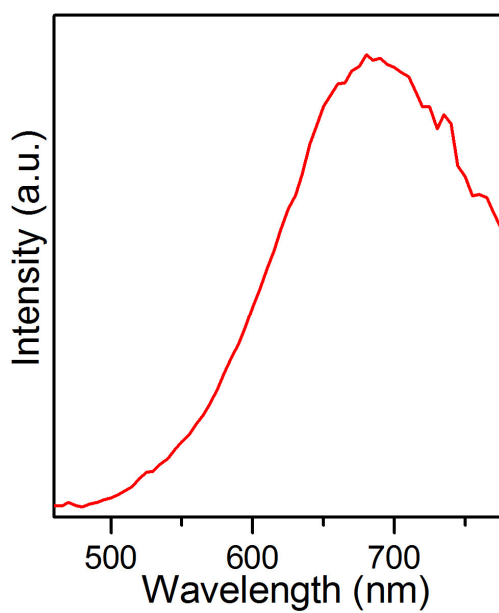

**Figure S10.** Solid-state fluorescence spectrum of  $\text{Ag}_{14}\text{-LR}$  at room temperature, excited at 420 nm.

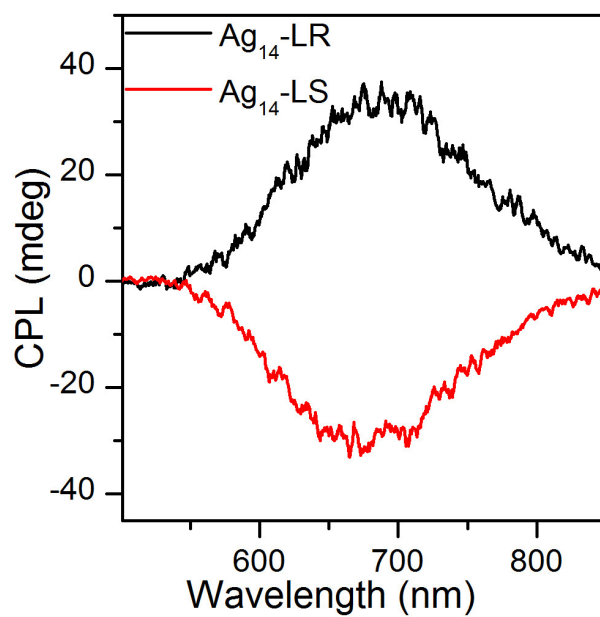

**Figure S11.** Solid-state CPL spectra of the **Ag<sub>14</sub>-LR/LS** enantiomers.

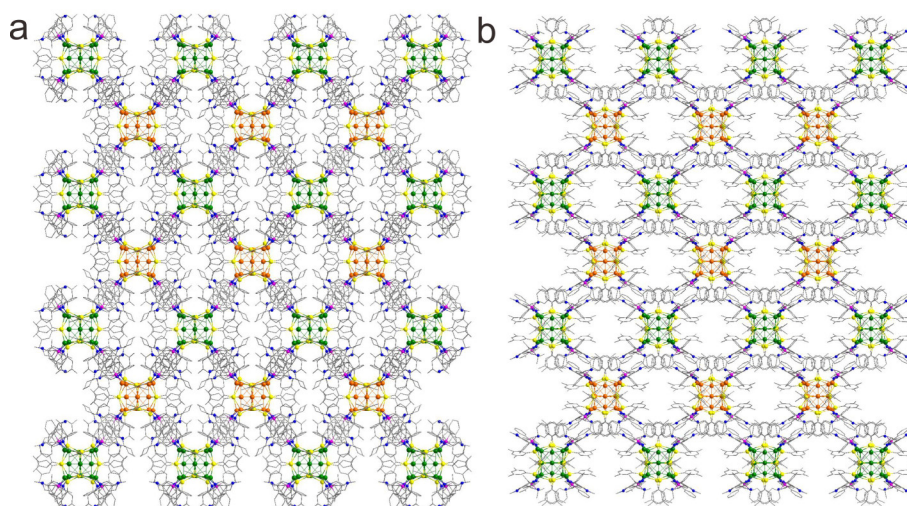

**Figure S12.** Crystal structure of **Ag<sub>14</sub>-LRS** viewed along *c* (a) and *b* axis (b). Color legend: orange and green sphere, Ag; yellow sphere, S; pink sphere, P; blue sphere, N; grey sphere, C. All hydrogen and fluorine atoms are omitted for clarity.

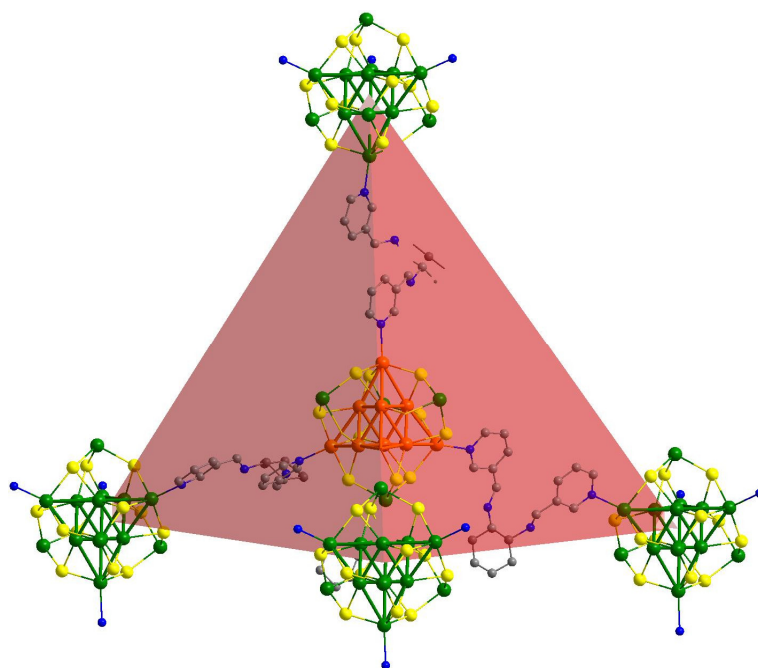

**Figure S13.** Regular tetrahedron structure formed by the **Ag<sub>14</sub>** building blocks (as nodes) in **Ag<sub>14</sub>-LRS**. Color legend: orange and green sphere, Ag; yellow sphere, S; blue sphere, N; grey sphere, C.

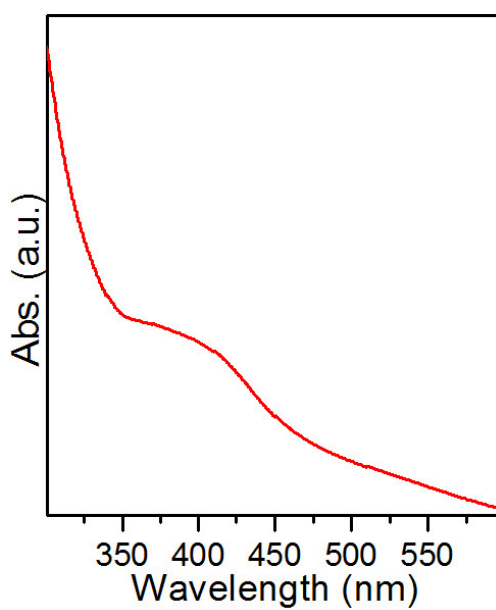

**Figure S14.** Solid state UV-vis spectrum of **Ag<sub>14</sub>-LRS** (crystals).



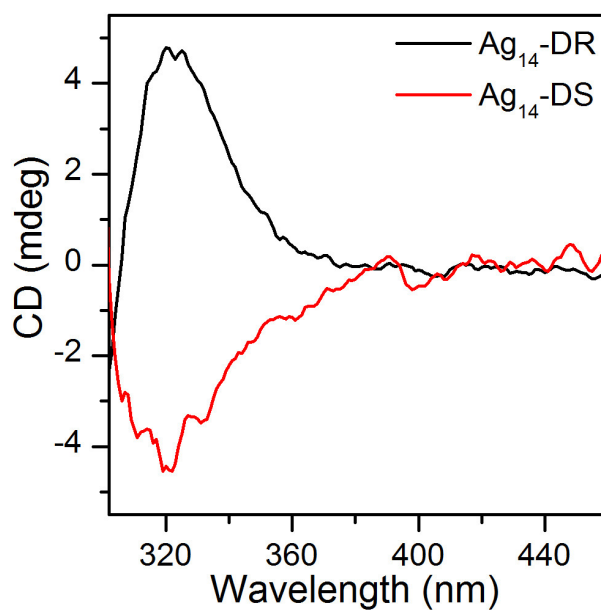

**Figure S15.** CD spectra of **Ag<sub>14</sub>-DR** and **Ag<sub>14</sub>-DS** in dichloromethane, DMF and methanol mixed solution (1.0 : 0.05 : 0.1).

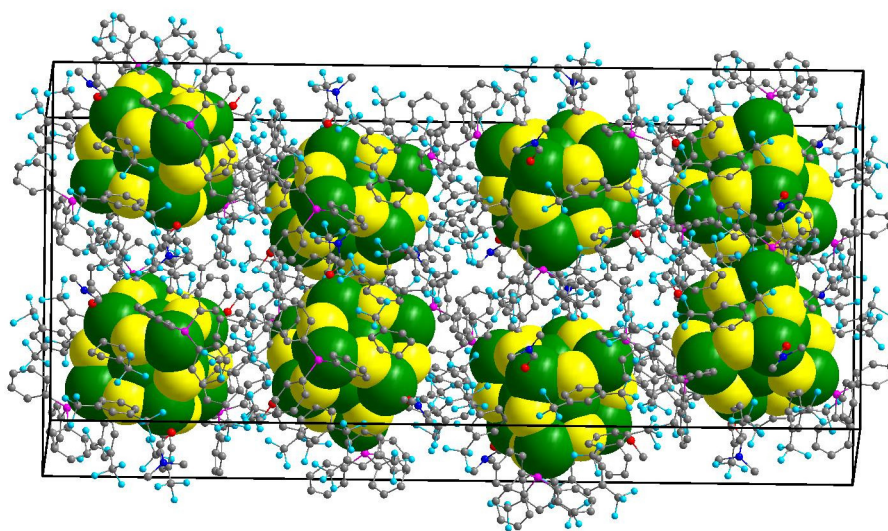

**Figure S16.** The packing diagram of **R-Ag<sub>14m</sub>**. Colour legend: green sphere, Ag; yellow sphere, S; pink sphere, P; red sphere, O; blue sphere, N; sky blue sphere, F; grey sphere, C. All hydrogen atoms are omitted for clarity.

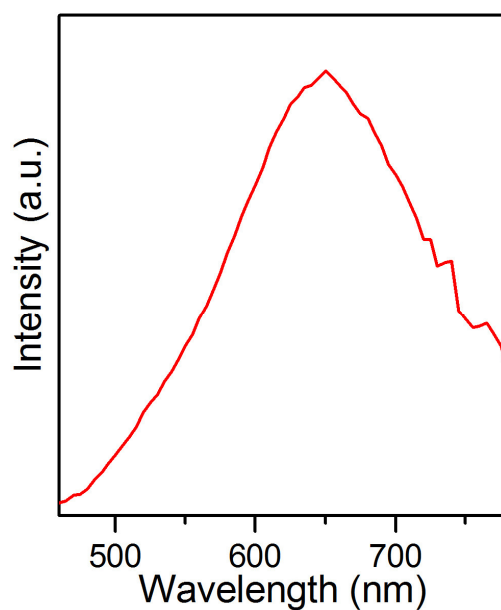

**Figure S17.** Solid-state fluorescence spectrum of **R-Ag<sub>14m</sub>** at room temperature, excited at 420 nm.

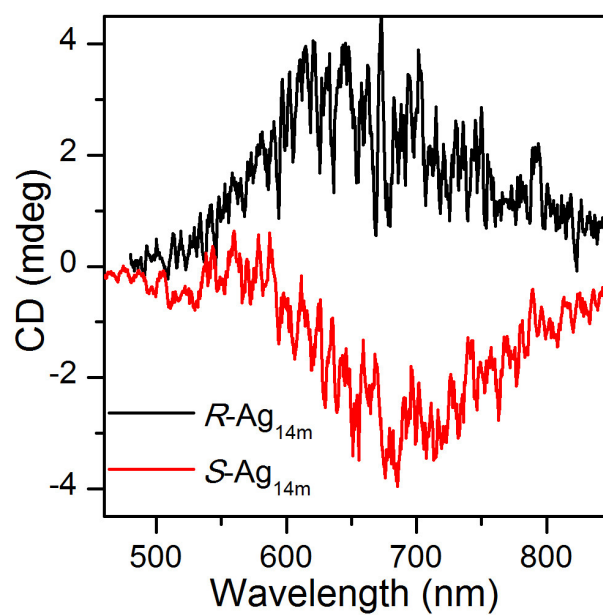

**Figure S18.** Solid-state CPL spectra of the **R/S-Ag<sub>14m</sub>** enantiomers.

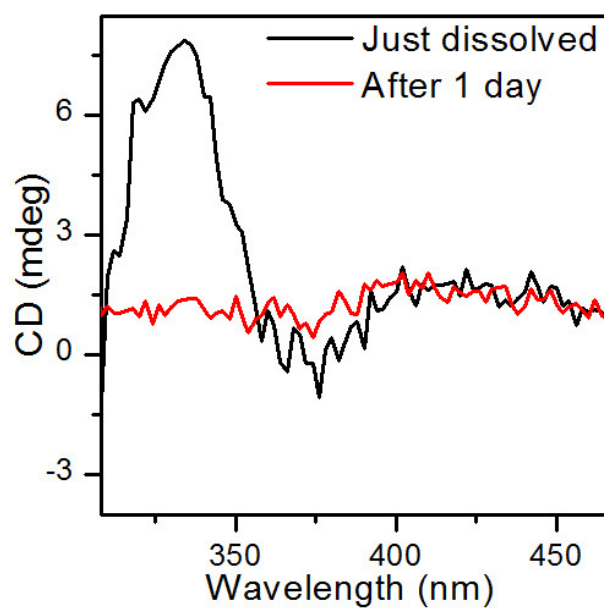

**Figure S19.** Comparison of the CD spectra of the **R-Ag<sub>14m</sub>** crystals just dissolved in DMF and after 1 day at room temperature.

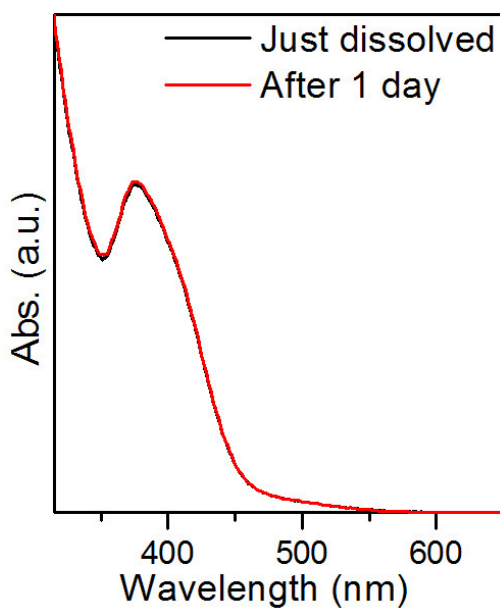

**Figure S20.** Comparison of the UV-vis spectra of the **R-Ag<sub>14m</sub>** crystals just dissolved in DMF and after 1 day at room temperature.

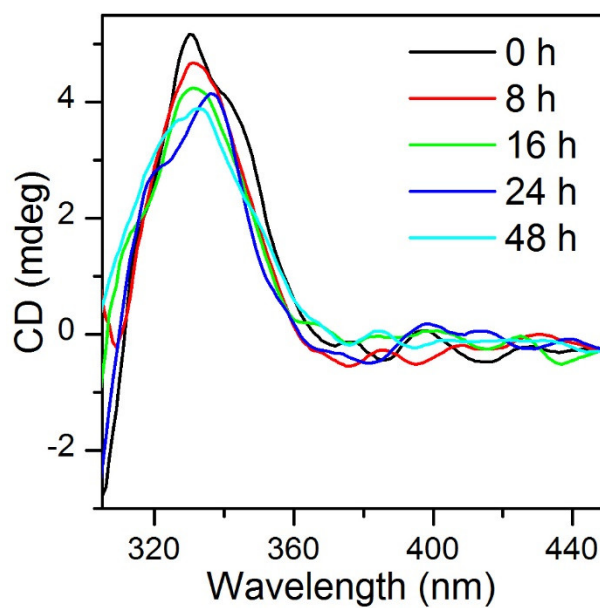

**Figure S21.** The intensity changes of the CD spectra of  $\text{Ag}_{14}\text{-DR}$  in dichloromethane, DMF and methanol mixed solution (1.0 : 0.05 : 0.1) with times at different 25 °C.

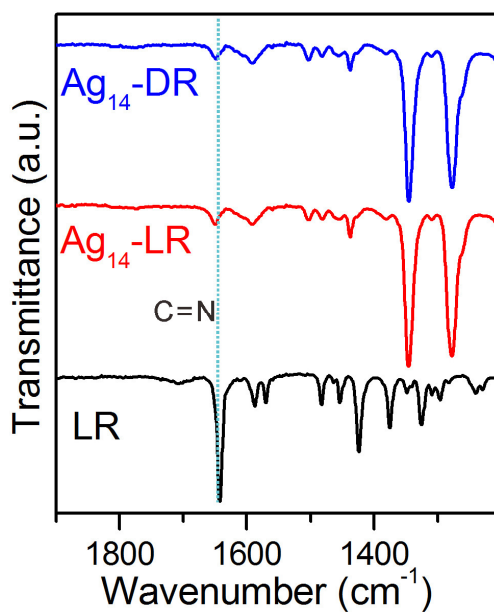

**Figure S22.** Solid-state FT-IR spectra of  $\text{Ag}_{14}\text{-DR}$ , crystals of  $\text{Ag}_{14}\text{-LR}$  and LR.

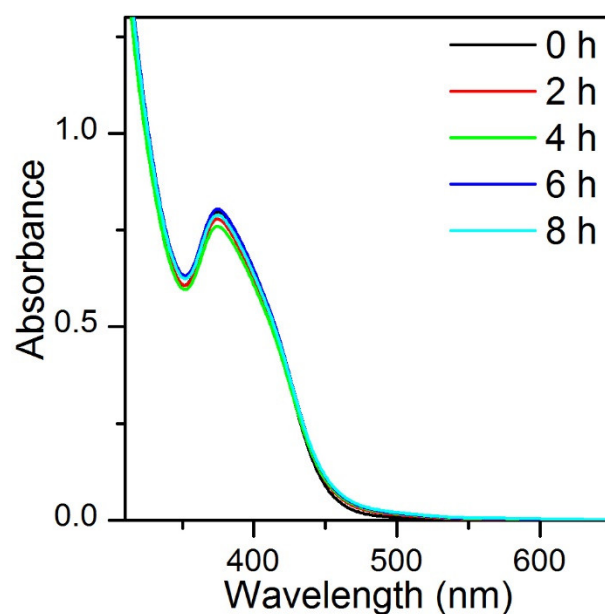

**Figure S23.** UV-vis spectra of pure **R-Ag<sub>14m</sub>** crystals dissolved in DMF during racemization at 30 °C.

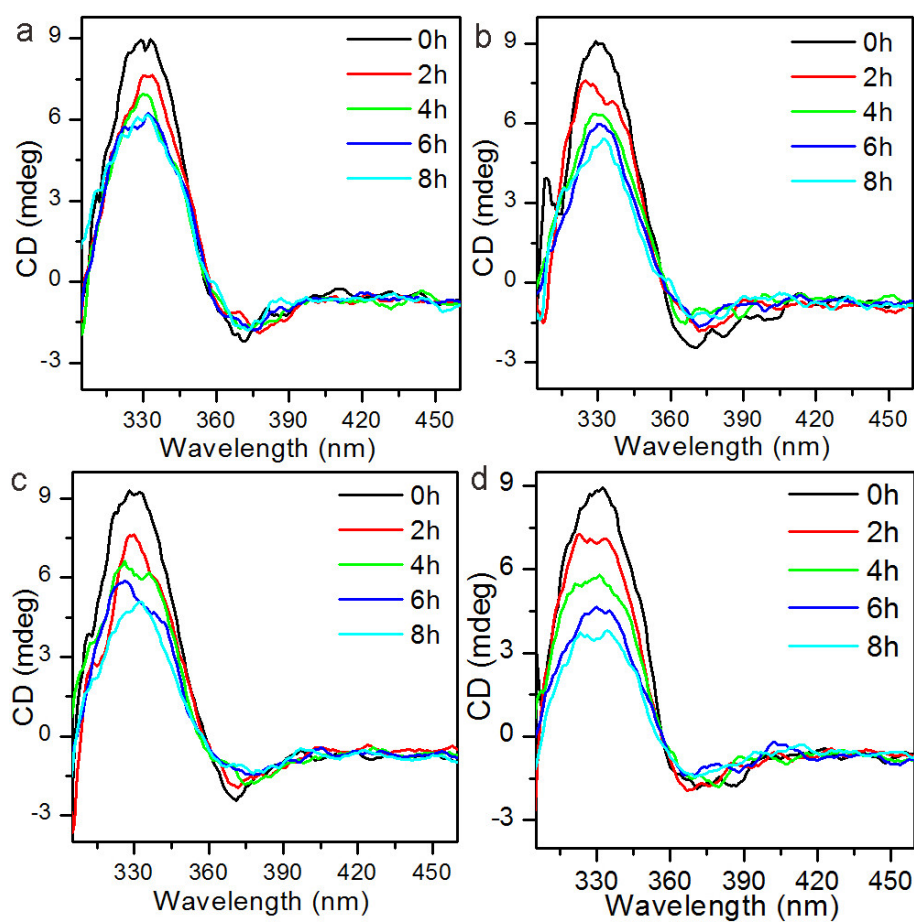

**Figure S24.** The intensity changes of the CD spectra of **R-Ag<sub>14m</sub>** crystals in DMF with times at different temperatures: (a) 0 °C; (b) 10 °C; (c) 20 °C; (d) 30 °C.

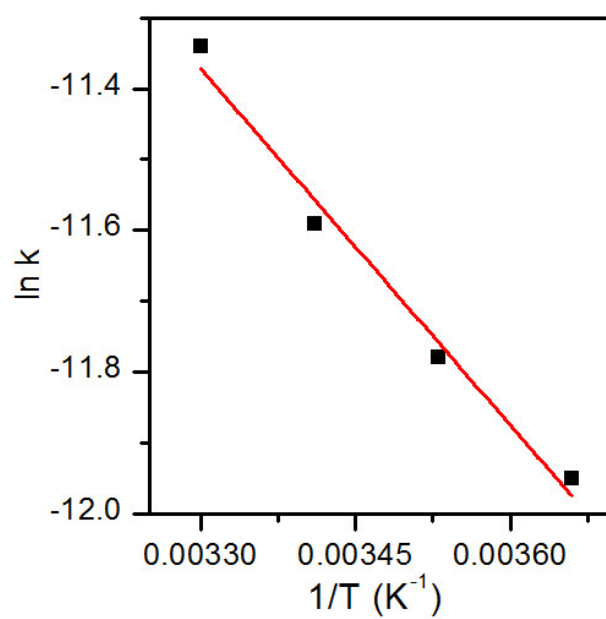

**Figure S25.** Arrhenius plot  $\ln(k)$  vs  $1/T$  for the auto-racemization of pure crystals of **R-Ag14m**.

**Table S1.** Crystal data and structure refinement for **Ag<sub>14</sub>-LR**.

|                                                |                                                                                                                  |
|------------------------------------------------|------------------------------------------------------------------------------------------------------------------|
| Identification code                            | <b>Ag<sub>14</sub>-LR</b>                                                                                        |
| Empirical formula                              | C <sub>204</sub> H <sub>136</sub> Ag <sub>14</sub> F <sub>72</sub> N <sub>8</sub> P <sub>4</sub> S <sub>12</sub> |
| Formula weight                                 | 6085.98                                                                                                          |
| Temperature/K                                  | 100.01(10)                                                                                                       |
| Crystal system                                 | hexagonal                                                                                                        |
| Space group                                    | P6 <sub>1</sub> 22                                                                                               |
| a/Å                                            | 23.6655(7)                                                                                                       |
| b/Å                                            | 23.6655(7)                                                                                                       |
| c/Å                                            | 81.7805(17)                                                                                                      |
| $\alpha/^\circ$                                | 90                                                                                                               |
| $\beta/^\circ$                                 | 90                                                                                                               |
| $\gamma/^\circ$                                | 120                                                                                                              |
| Volume/Å <sup>3</sup>                          | 39665(2)                                                                                                         |
| Z                                              | 6                                                                                                                |
| $\rho_{\text{calc}}/\text{cm}^3$               | 1.529                                                                                                            |
| $\mu/\text{mm}^{-1}$                           | 10.069                                                                                                           |
| F(000)                                         | 17844.0                                                                                                          |
| Crystal size/mm <sup>3</sup>                   | 0.02 × 0.01 × 0.01                                                                                               |
| Radiation                                      | Cu K $\alpha$ ( $\lambda$ = 1.54184)                                                                             |
| 2 $\Theta$ range for data collection/ $^\circ$ | 6.914 to 122.338                                                                                                 |
| Index ranges                                   | -16 ≤ h ≤ 24, -21 ≤ k ≤ 18, -88 ≤ l ≤ 92                                                                         |
| Reflections collected                          | 77560                                                                                                            |
| Independent reflections                        | 19620 [ $R_{\text{int}}$ = 0.1399, $R_{\text{sigma}}$ = 0.1315]                                                  |
| Data/restraints/parameters                     | 19620/1564/1355                                                                                                  |
| Goodness-of-fit on F <sup>2</sup>              | 1.042                                                                                                            |
| Final R indexes [ $I \geq 2\sigma(I)$ ]        | $R_1$ = 0.1023, $wR_2$ = 0.2235                                                                                  |
| Final R indexes [all data]                     | $R_1$ = 0.1265, $wR_2$ = 0.2442                                                                                  |
| Largest diff. peak/hole / e Å <sup>-3</sup>    | 1.51/-1.67                                                                                                       |
| Flack parameter                                | 0.018(8)                                                                                                         |

**Table S2.** Crystal data and structure refinement for **Ag<sub>14</sub>-LS**.

|                                                |                                                                                                                  |
|------------------------------------------------|------------------------------------------------------------------------------------------------------------------|
| Identification code                            | <b>Ag<sub>14</sub>-LS</b>                                                                                        |
| Empirical formula                              | C <sub>204</sub> H <sub>136</sub> Ag <sub>14</sub> F <sub>72</sub> N <sub>8</sub> P <sub>4</sub> S <sub>12</sub> |
| Formula weight                                 | 6085.98                                                                                                          |
| Temperature/K                                  | 100.01(10)                                                                                                       |
| Crystal system                                 | hexagonal                                                                                                        |
| Space group                                    | P6 <sub>5</sub> 22                                                                                               |
| a/Å                                            | 23.6036(4)                                                                                                       |
| b/Å                                            | 23.6036(4)                                                                                                       |
| c/Å                                            | 80.9175(11)                                                                                                      |
| $\alpha/^\circ$                                | 90                                                                                                               |
| $\beta/^\circ$                                 | 90                                                                                                               |
| $\gamma/^\circ$                                | 120                                                                                                              |
| Volume/Å <sup>3</sup>                          | 39041.8(14)                                                                                                      |
| Z                                              | 6                                                                                                                |
| $\rho_{\text{calc}}/\text{cm}^3$               | 1.553                                                                                                            |
| $\mu/\text{mm}^{-1}$                           | 10.229                                                                                                           |
| F(000)                                         | 17844.0                                                                                                          |
| Crystal size/mm <sup>3</sup>                   | 0.03 × 0.02 × 0.02                                                                                               |
| Radiation                                      | Cu K $\alpha$ ( $\lambda$ = 1.54184)                                                                             |
| 2 $\Theta$ range for data collection/ $^\circ$ | 6.966 to 122.338                                                                                                 |
| Index ranges                                   | -26 ≤ h ≤ 26, -26 ≤ k ≤ 26, -91 ≤ l ≤ 91                                                                         |
| Reflections collected                          | 156944                                                                                                           |
| Independent reflections                        | 20006 [ $R_{\text{int}}$ = 0.1401, $R_{\text{sigma}}$ = 0.0703]                                                  |
| Data/restraints/parameters                     | 20006/1002/1415                                                                                                  |
| Goodness-of-fit on F <sup>2</sup>              | 1.069                                                                                                            |
| Final R indexes [ $I \geq 2\sigma(I)$ ]        | $R_1$ = 0.0892, $wR_2$ = 0.1872                                                                                  |
| Final R indexes [all data]                     | $R_1$ = 0.1013, $wR_2$ = 0.1959                                                                                  |
| Largest diff. peak/hole / e Å <sup>-3</sup>    | 1.40/-1.13                                                                                                       |
| Flack parameter                                | 0.055(5)                                                                                                         |



**Table S3.** Crystal data and structure refinement for **Ag<sub>14</sub>-LRS**.

|                                                |                                                                                                                  |
|------------------------------------------------|------------------------------------------------------------------------------------------------------------------|
| Identification code                            | <b>Ag<sub>14</sub>-LRS</b>                                                                                       |
| Empirical formula                              | C <sub>204</sub> H <sub>136</sub> Ag <sub>14</sub> F <sub>72</sub> N <sub>8</sub> P <sub>4</sub> S <sub>12</sub> |
| Formula weight                                 | 6085.98                                                                                                          |
| Temperature/K                                  | 100.00(10)                                                                                                       |
| Crystal system                                 | orthorhombic                                                                                                     |
| Space group                                    | Pnnn                                                                                                             |
| a/Å                                            | 20.4683(3)                                                                                                       |
| b/Å                                            | 24.1337(4)                                                                                                       |
| c/Å                                            | 25.9145(6)                                                                                                       |
| $\alpha/^\circ$                                | 90                                                                                                               |
| $\beta/^\circ$                                 | 90                                                                                                               |
| $\gamma/^\circ$                                | 90                                                                                                               |
| Volume/Å <sup>3</sup>                          | 12801.1(4)                                                                                                       |
| Z                                              | 2                                                                                                                |
| $\rho_{\text{calc}}/\text{cm}^3$               | 1.579                                                                                                            |
| $\mu/\text{mm}^{-1}$                           | 10.400                                                                                                           |
| F(000)                                         | 5948.0                                                                                                           |
| Crystal size/mm <sup>3</sup>                   | 0.02 × 0.01 × 0.01                                                                                               |
| Radiation                                      | Cu K $\alpha$ ( $\lambda$ = 1.54184)                                                                             |
| 2 $\Theta$ range for data collection/ $^\circ$ | 7.326 to 122.338                                                                                                 |
| Index ranges                                   | -23 ≤ h ≤ 20, -27 ≤ k ≤ 20, -27 ≤ l ≤ 29                                                                         |
| Reflections collected                          | 38362                                                                                                            |
| Independent reflections                        | 9835 [ $R_{\text{int}}$ = 0.0693, $R_{\text{sigma}}$ = 0.0529]                                                   |
| Data/restraints/parameters                     | 9835/752/784                                                                                                     |
| Goodness-of-fit on F <sup>2</sup>              | 1.017                                                                                                            |
| Final R indexes [ $I \geq 2\sigma(I)$ ]        | $R_1$ = 0.0616, $wR_2$ = 0.1627                                                                                  |
| Final R indexes [all data]                     | $R_1$ = 0.0909, $wR_2$ = 0.1930                                                                                  |
| Largest diff. peak/hole / e Å <sup>-3</sup>    | 1.63/-1.00                                                                                                       |

**Table S4.** Crystal data and structure refinement for **R-Ag<sub>14m</sub>**.

|                                                |                                                                                                                                 |
|------------------------------------------------|---------------------------------------------------------------------------------------------------------------------------------|
| Identification code                            | <b>R-Ag<sub>14m</sub></b>                                                                                                       |
| Empirical formula                              | C <sub>178</sub> H <sub>121</sub> Ag <sub>14</sub> F <sub>72</sub> N <sub>3</sub> O <sub>4</sub> P <sub>4</sub> S <sub>12</sub> |
| Formula weight                                 | 5752.55                                                                                                                         |
| Temperature/K                                  | 100.01(10)                                                                                                                      |
| Crystal system                                 | orthorhombic                                                                                                                    |
| Space group                                    | C222 <sub>1</sub>                                                                                                               |
| a/Å                                            | 24.9972(3)                                                                                                                      |
| b/Å                                            | 30.3589(4)                                                                                                                      |
| c/Å                                            | 56.1233(7)                                                                                                                      |
| $\alpha/^\circ$                                | 90                                                                                                                              |
| $\beta/^\circ$                                 | 90                                                                                                                              |
| $\gamma/^\circ$                                | 90                                                                                                                              |
| Volume/Å <sup>3</sup>                          | 42591.3(9)                                                                                                                      |
| Z                                              | 8                                                                                                                               |
| $\rho_{\text{calc}}/\text{cm}^3$               | 1.794                                                                                                                           |
| $\mu/\text{mm}^{-1}$                           | 12.465                                                                                                                          |
| F(000)                                         | 22400.0                                                                                                                         |
| Crystal size/mm <sup>3</sup>                   | 0.05 × 0.02 × 0.02                                                                                                              |
| Radiation                                      | Cu K $\alpha$ ( $\lambda$ = 1.54184)                                                                                            |
| 2 $\Theta$ range for data collection/ $^\circ$ | 6.58 to 122.338                                                                                                                 |
| Index ranges                                   | -25 ≤ h ≤ 28, -34 ≤ k ≤ 34, -63 ≤ l ≤ 63                                                                                        |
| Reflections collected                          | 129060                                                                                                                          |
| Independent reflections                        | 32755 [ $R_{\text{int}}$ = 0.1137, $R_{\text{sigma}}$ = 0.0904]                                                                 |
| Data/restraints/parameters                     | 32755/1869/2570                                                                                                                 |
| Goodness-of-fit on F <sup>2</sup>              | 1.058                                                                                                                           |
| Final R indexes [ $I \geq 2\sigma(I)$ ]        | $R_1$ = 0.0790, $wR_2$ = 0.1977                                                                                                 |
| Final R indexes [all data]                     | $R_1$ = 0.0944, $wR_2$ = 0.2110                                                                                                 |
| Largest diff. peak/hole / e Å <sup>-3</sup>    | 1.92/-1.29                                                                                                                      |
| Flack parameter                                | -0.026(5)                                                                                                                       |

**Table S5.** Crystal data and structure refinement for **S-Ag<sub>14</sub>m**.

|                                                |                                                                                                                                 |
|------------------------------------------------|---------------------------------------------------------------------------------------------------------------------------------|
| Identification code                            | <b>S-Ag<sub>14</sub>m</b>                                                                                                       |
| Empirical formula                              | C <sub>178</sub> H <sub>121</sub> Ag <sub>14</sub> F <sub>72</sub> N <sub>3</sub> O <sub>4</sub> P <sub>4</sub> S <sub>12</sub> |
| Formula weight                                 | 5752.55                                                                                                                         |
| Temperature/K                                  | 100.01(10)                                                                                                                      |
| Crystal system                                 | orthorhombic                                                                                                                    |
| Space group                                    | C222 <sub>1</sub>                                                                                                               |
| a/Å                                            | 24.8562(2)                                                                                                                      |
| b/Å                                            | 30.5304(3)                                                                                                                      |
| c/Å                                            | 56.0821(5)                                                                                                                      |
| $\alpha/^\circ$                                | 90                                                                                                                              |
| $\beta/^\circ$                                 | 90                                                                                                                              |
| $\gamma/^\circ$                                | 90                                                                                                                              |
| Volume/Å <sup>3</sup>                          | 42559.1(7)                                                                                                                      |
| Z                                              | 8                                                                                                                               |
| $\rho_{\text{calc}}/\text{cm}^3$               | 1.796                                                                                                                           |
| $\mu/\text{mm}^{-1}$                           | 12.475                                                                                                                          |
| F(000)                                         | 22400.0                                                                                                                         |
| Crystal size/mm <sup>3</sup>                   | 0.04 × 0.02 × 0.02                                                                                                              |
| Radiation                                      | Cu K $\alpha$ ( $\lambda$ = 1.54184)                                                                                            |
| 2 $\Theta$ range for data collection/ $^\circ$ | 6.586 to 122.334                                                                                                                |
| Index ranges                                   | -28 ≤ h ≤ 16, -34 ≤ k ≤ 33, -63 ≤ l ≤ 48                                                                                        |
| Reflections collected                          | 69042                                                                                                                           |
| Independent reflections                        | 32631 [ $R_{\text{int}}$ = 0.0594, $R_{\text{sigma}}$ = 0.0606]                                                                 |
| Data/restraints/parameters                     | 32631/1935/2557                                                                                                                 |
| Goodness-of-fit on F <sup>2</sup>              | 1.057                                                                                                                           |
| Final R indexes [ $I \geq 2\sigma(I)$ ]        | $R_1 = 0.0692$ , $wR_2 = 0.1759$                                                                                                |
| Final R indexes [all data]                     | $R_1 = 0.0712$ , $wR_2 = 0.1776$                                                                                                |
| Largest diff. peak/hole / e Å <sup>-3</sup>    | 2.21/-2.33                                                                                                                      |
| Flack parameter                                | 0.015(5)                                                                                                                        |
